# Supplementary material
Source: PubMed Central journal article supplement (PMC3129566)
Supplement: mt201152x5.pdf [file mt201152x5.pdf]

**Table S1. Primers Used for Quantitative PCR**

| <b>Gene</b>    | <b>Forward Primer (5'-3')</b> | <b>Reverse Primer (5'-3')</b> |
|----------------|-------------------------------|-------------------------------|
| VEGFA          | CTCTACCTCCACCATGCCAAG         | AGACATCCATGAACTTCACCACTTC     |
| CXCR4          | CTTACTACATTGGGATCAGCATCG      | AGTGTTCTCAAACCTCACACCCTTG     |
| PECAM-1        | CTGCAATGTGCTGTGAATGAAG        | TCCTTGTTAGCCTTCTGCTTGG        |
| PDGF-B         | GATCGAGATTGTGCGGAAGAAG        | AGCTGCCACTGTCTCACACTTG        |
| HGF            | GATTGGATCAGGACCATGTGAG        | TCCACGACCAGGAACAATGAC         |
| $\beta$ -Actin | AGCCTCGCCTTTGCCGA             | CTGGTGCCTGGGGCG               |
