# Supplementary material
Source: PubMed Central journal article supplement (PMC3129566)
Supplement: mt201152x7.pdf [file mt201152x7.pdf]

## Supplementary Results

### *Angiogenic Agent Expression Analysis*

There was a significant reduction in expression of VEGFA mRNA ( $0.353\pm 0.062$  vs.  $0.755\pm 0.091$ ;  $p<0.01$ ) in high FRS patients compared to healthy controls and a trend toward reduced expression of eNOS ( $0.0258\pm 0.0078$  vs.  $0.0709\pm 0.0214$ ;  $p=0.06$ ) and PDGF-B ( $10.93\pm 1.47$  vs.  $16.71\pm 2.69$ ;  $p=0.07$ ; Fig. S2a). However, reductions in the expression of HGF ( $0.108\pm 0.045$  vs.  $0.281\pm 0.145$ ;  $p=0.24$ ), CXCR4 ( $41.7\pm 10.9$  vs.  $103.6\pm 32.4$ ;  $p=0.41$ ) and PECAM-1 ( $0.53\pm 0.09$  vs.  $1.09\pm 0.27$ ;  $p=0.18$ ) did not reach statistical significance. Similarly, we also observed a reduction in the release of VEGF ( $36.08\pm 4.70$  vs.  $52.31\pm 4.84$  pg/mL;  $p<0.05$ ) and HGF ( $0.168\pm 0.023$  vs.  $0.288\pm 0.043$  pg/mL;  $p<0.05$ ; Fig. S2b) protein in conditioned medium obtained from cells of high FRS subjects.

### *CAC Adhesion to an Activated Endothelial Cell Layer*

Adhesion of CACs to a TNF- $\alpha$ -activated EC monolayer was not modified by eNOS transduction ( $58.1\pm 6.9$  vs.  $47.2\pm 4.8$  CACs/HPF;  $n=10$ ;  $p=0.119$ ; Fig. S4).
