# Supplementary material
Source: PubMed Central journal article supplement (PMC3129566)

**a**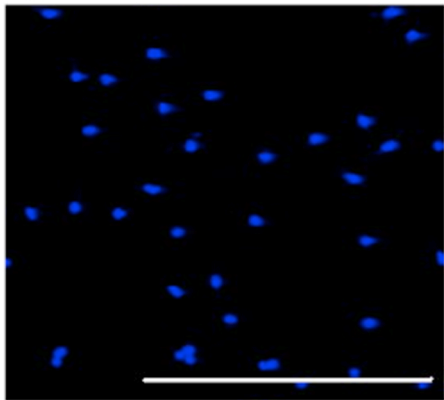**b**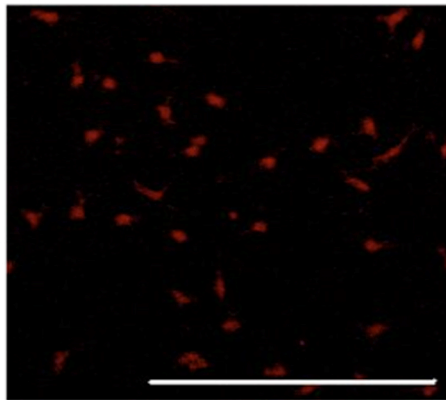**c**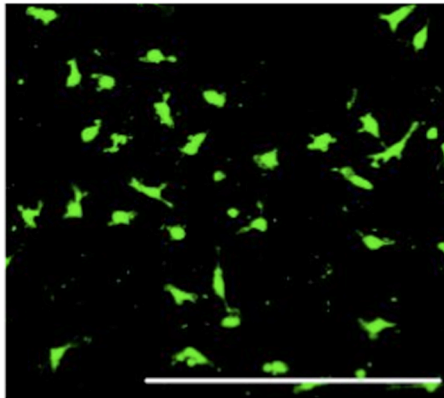**d**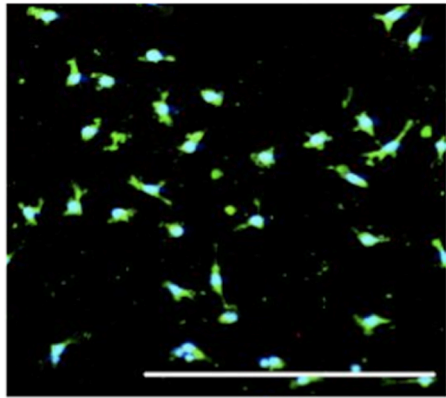

Supplement: mt201152x1.pdf [file mt201152x1.pdf]

**a**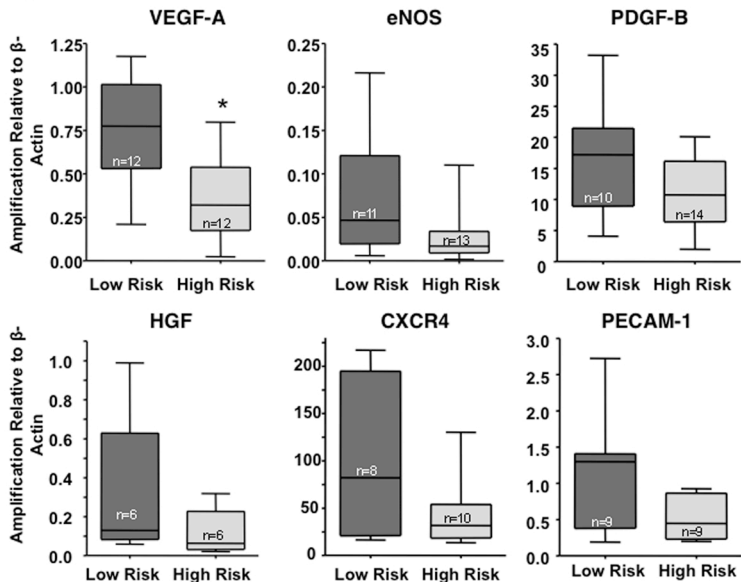**b**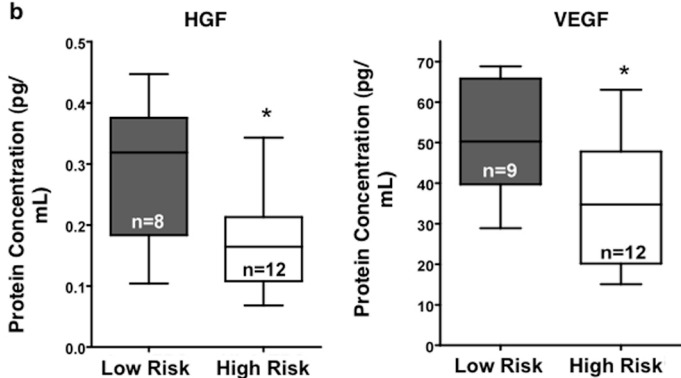

Supplement: mt201152x2.pdf [file mt201152x2.pdf]

**a**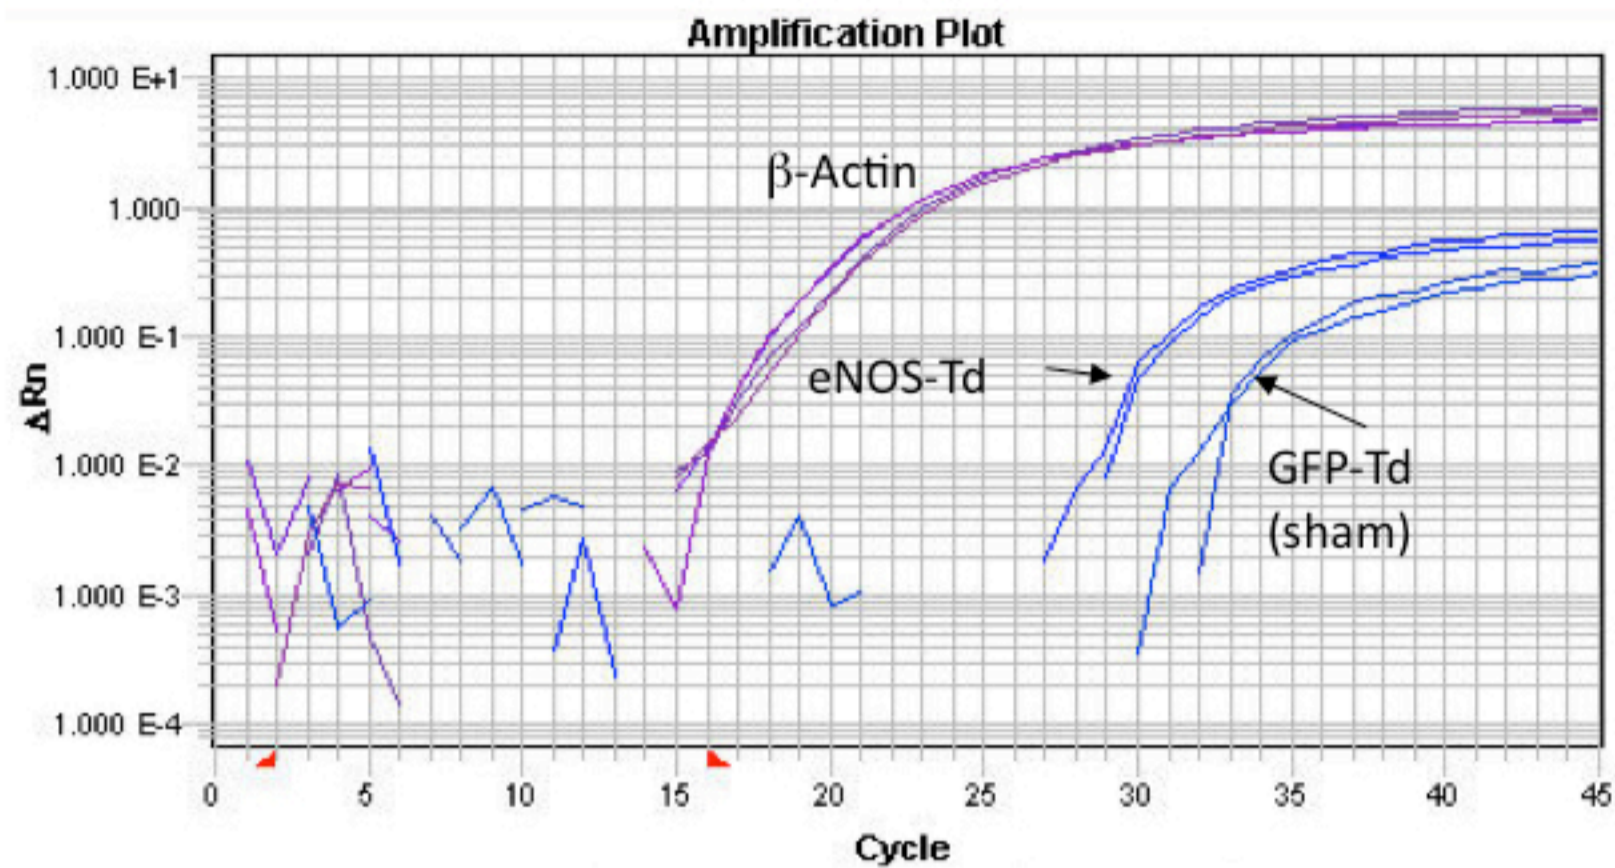**b**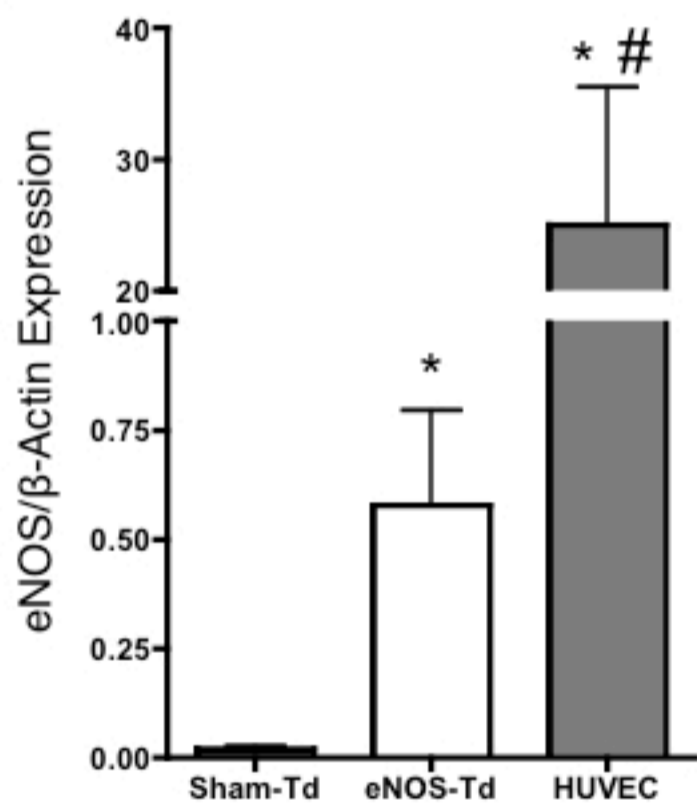**c**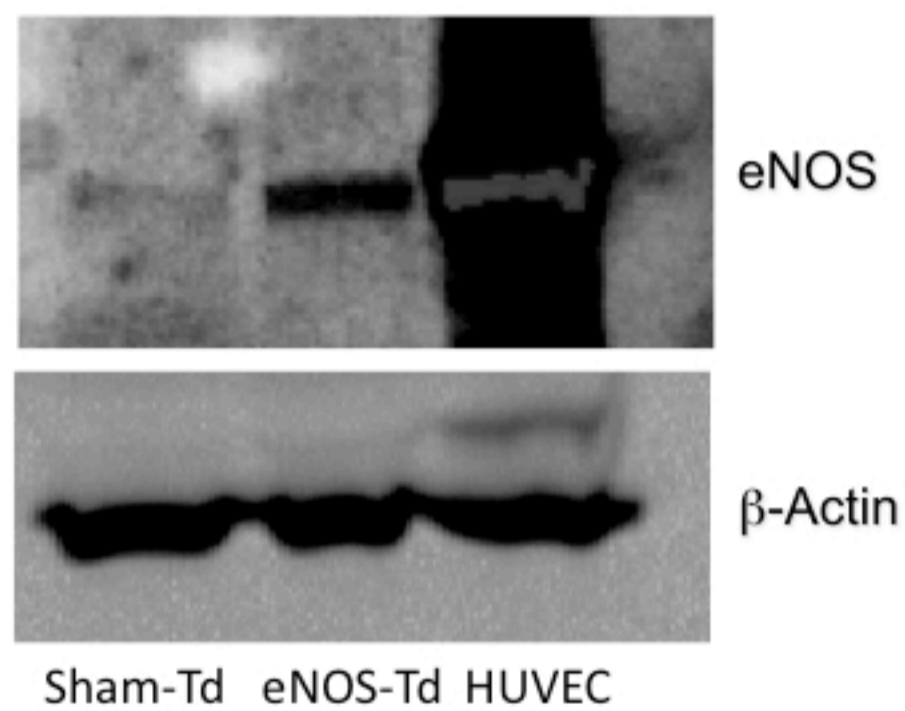

Supplement: mt201152x3.pdf [file mt201152x3.pdf]

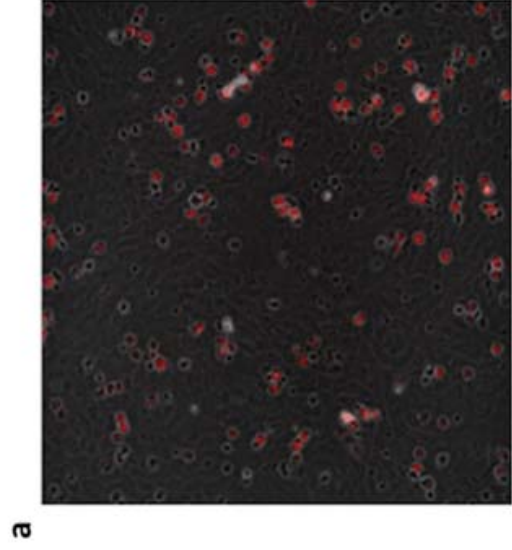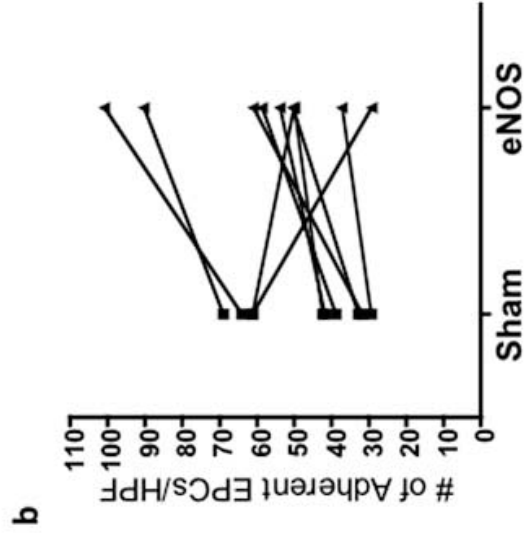

Supplement: mt201152x4.pdf [file mt201152x4.pdf]
